# Supplementary material for: Identification of acidic stress-responsive genes and acid tolerance engineering in Synechococcus elongatus PCC 7942
Source: PubMed Central journal article supplement (PMC10781874; doi:10.1007/s00253-023-12984-5), 2024-01-10
Supplement: 253_2023_12984_MOESM2_ESM.pdf [file 253_2023_12984_MOESM2_ESM.pdf]

**- Journal name**

Applied Microbiology and Biotechnology

**- Manuscript Title**

Identification of acidic stress responsive genes and acid tolerance engineering in  
*Synechococcus elongatus* PCC 7942

**- The name(s) of the author(s)**

Jie Zhang<sup>1, 2, 3</sup>, Tao Sun<sup>1, 2, 3, 4</sup>, Weiwen Zhang<sup>1, 2, 3, 4</sup>, Lei Chen<sup>1, 2, 3\*</sup>

**- The affiliation(s) and address(es) of the author(s)**

<sup>1</sup> *Laboratory of Synthetic Microbiology, School of Chemical Engineering & Technology,  
Tianjin University, Tianjin 300072, P.R. China ;*

<sup>2</sup> *Frontiers Science Center for Synthetic Biology, Tianjin University, Tianjin 300072,  
P.R. China ;*

<sup>3</sup> *Key Laboratory of Systems Bioengineering (MOE), Tianjin University, Tianjin 300072,  
P.R. China ;*

<sup>4</sup> *Center for Biosafety Research and Strategy, Tianjin University, Tianjin 300072, P.R.  
China.*

**- The e-mail address, telephone and fax numbers of the corresponding author**

\*Corresponding author:

Prof. Dr. Lei Chen

Laboratory of Synthetic Microbiology; School of Chemical Engineering & Technology;

Tianjin University, Tianjin 300072, P.R. China

Tel: 0086-22-2740-6394; Fax: 0086-22-2740-6364; Email: [lchen@tju.edu.cn](mailto:lchen@tju.edu.cn)

**Fig. S1** Biological reproducibility of RNA-seq data with three distinct clusters formed in the principal component analysis.

**Fig. S2** Relative gene expression levels obtained from RNA-seq and qRT-PCR analysis.

a) long-term acidic stress VS control; b) shock treatment VS control.

**Fig. S3** Growth patterns of overexpression mutants and control in BG11 medium at pH7.5

and pH5.6. a) *pex*; b) *synpcc7942\_2038*; c) *synpcc7942\_1890*; d) *synpcc7942\_2547*. The

error bars represented the calculated standard deviation of the measurements of three biological replicates.

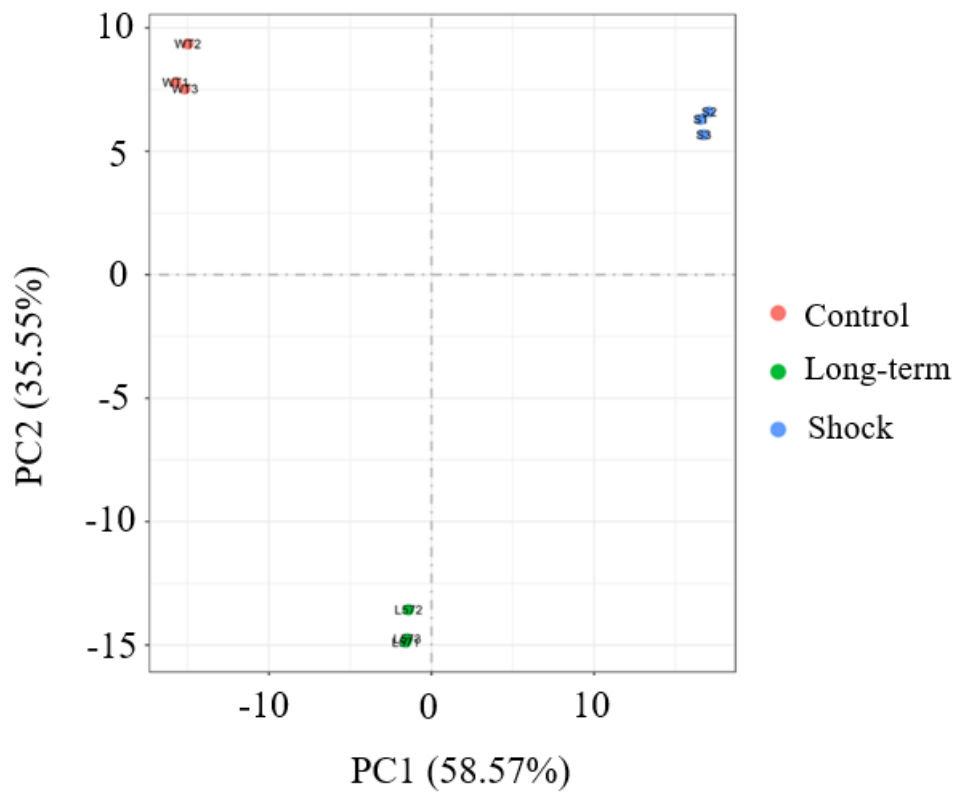

Fig. S1

a

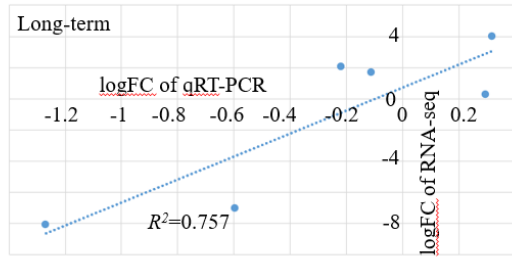

b

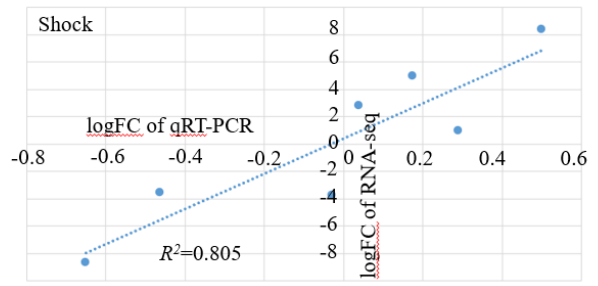

Fig. S2

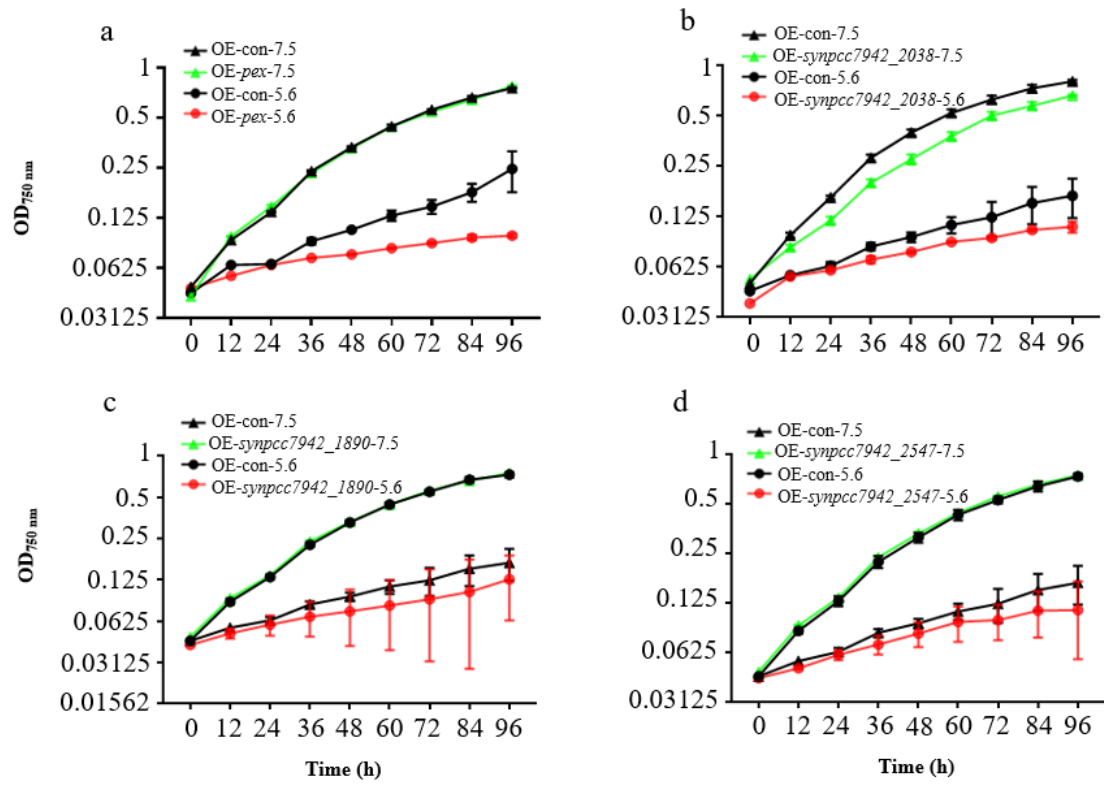

Fig. S3

## **Credit Author Statement**

J. Z wrote the manuscript, conducted the experiments and analyzed the data. L. C edited the manuscript and T. S supervised the work. Funding was sourced by L. C and W.W. Z.
